# Supplementary material for: Cooperation therapy between anti-growth by photodynamic-AIEgens and anti-metastasis by small molecule inhibitors in ovarian cancer
Source: PubMed Central journal article supplement (PMC7019153; doi:10.7150/thno.41708), 2020-01-16
Supplement: thnov10p2385s1.pdf [file thnov10p2385s1.pdf]

# **Cooperation therapy between anti-metastasis by small molecule inhibitors and anti-growth by photodynamic-AIEgens in ovarian cancer**

Jun Dai <sup>\*1</sup>, Min Xu <sup>\*2</sup>, Quan Wang <sup>2</sup>, Juliang Yang <sup>2</sup>, Jinjin Zhang <sup>1</sup>, Pengfei Cui <sup>1</sup>,  
Wenwen Wang <sup>1</sup>, Xiaoding Lou <sup>✉2</sup>, Fan Xia <sup>✉2</sup>, Shixuan Wang <sup>✉1</sup>

<sup>1</sup> Department of Obstetrics and Gynecology, Tongji Hospital, Tongji Medical College, Huazhong University of Science and Technology, Wuhan 430030, China.

<sup>2</sup> Engineering Research Center of Nano-Geomaterials of the Ministry of Education, Faculty of Materials Science and Chemistry, China University of Geosciences, Wuhan 430074, China.

\* These authors contributed equally to this work.

✉ Corresponding author: louxiaoding@cug.edu.cn (Xiaoding Lou);  
xiafan@cug.edu.cn (Fan Xia); shixuanwang@tjh.tjmu.edu.cn (Shixuan Wang)

## 2. Supporting Figures

**Figure S1**

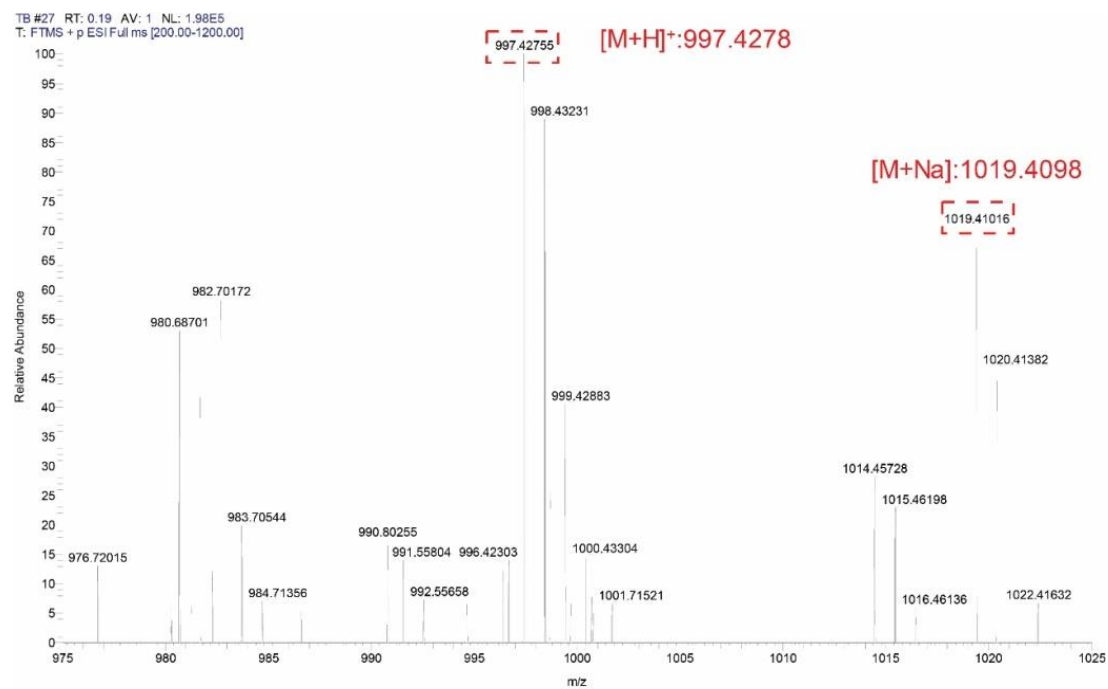

**Figure S1.** High resolution mass spectrum (HRMS) (MALDI-TOF) of TB,  $[M+H]^+$  997.42775 (calcd 997.4278);  $[M+Na]$  1019.41016 (calcd 1019.4098).

**Figure S2**

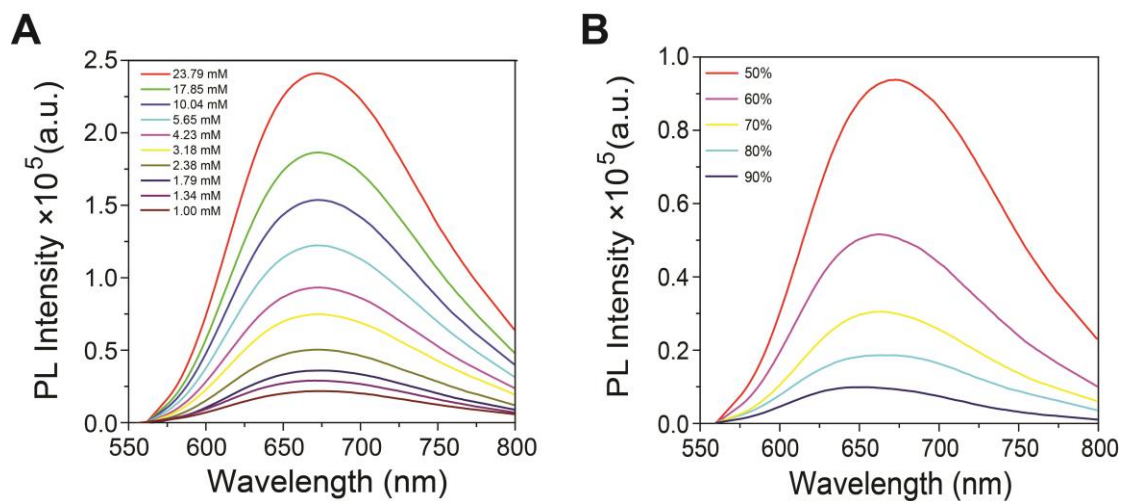

**Figure S2.** (A) The PL intensity of TB with different concentrations. (B) The PL intensity of TB (1 mM) in the THF/water mixtures.

**Figure S3**

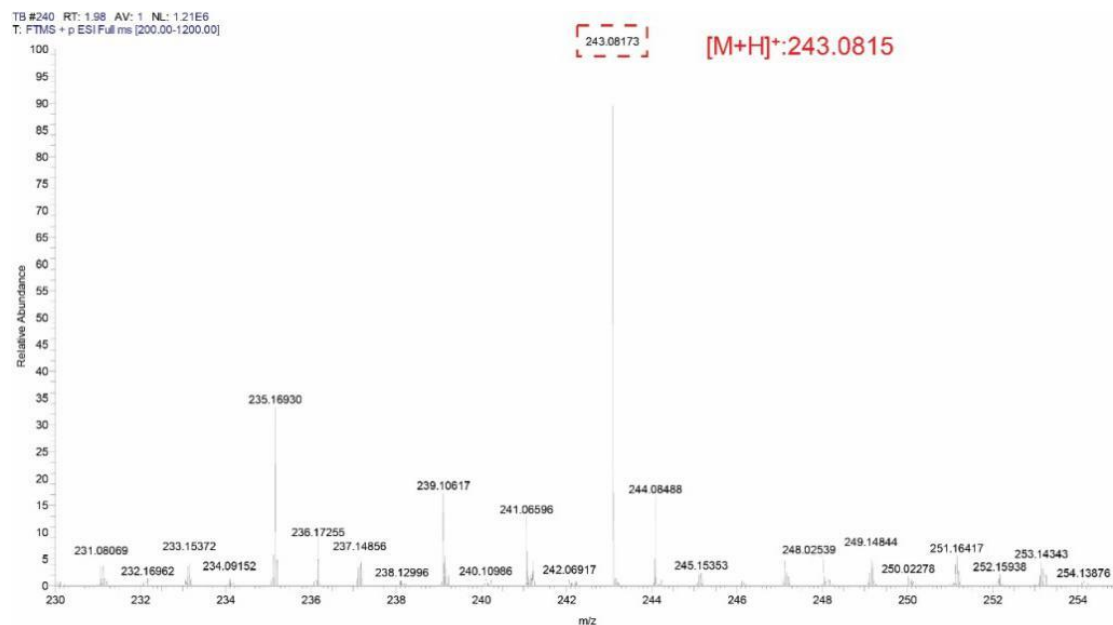

**Figure S3.** The HRMS (MALDI-TOF) of KBU2046,  $[M+H]^+$  243.08173 (calcd 243.0815).

**Figure S4**

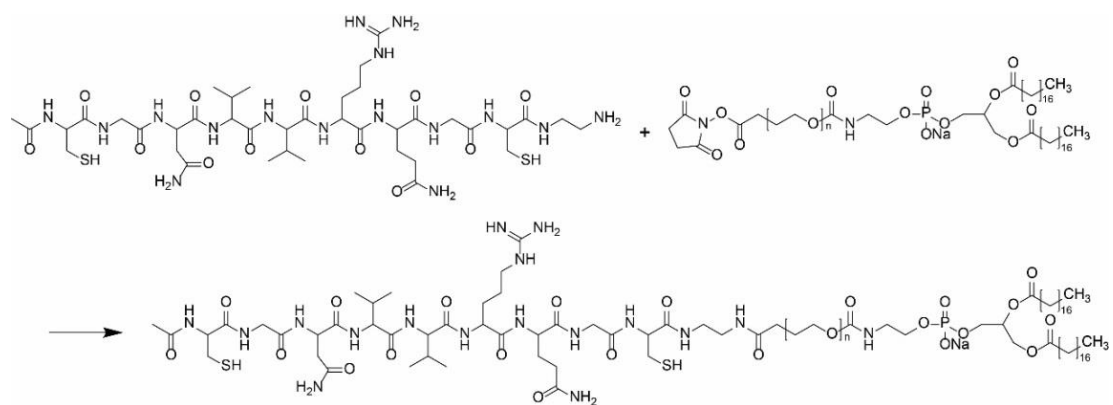

**Figure S4.** Synthesis of TMTP1-PEG-DSPE.

**Figure S5**

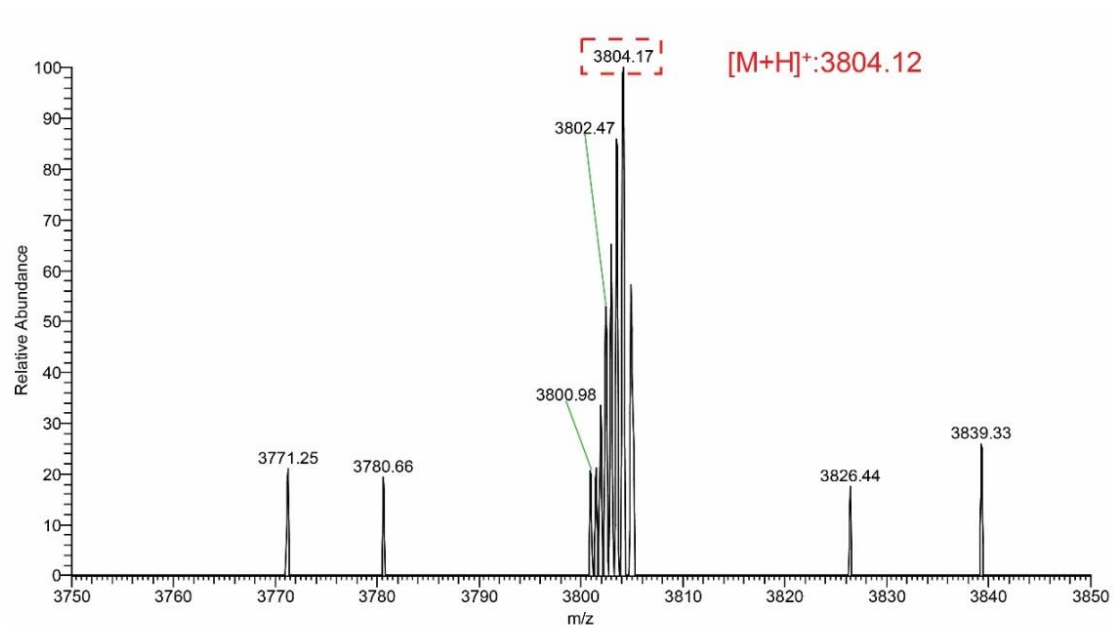

**Figure S5.** The HRMS (MALDI-TOF) of TMTTP1-PEG-DSPE, [M+H]<sup>+</sup> 3804.17 (calcd 3804.12).

**Figure S6**

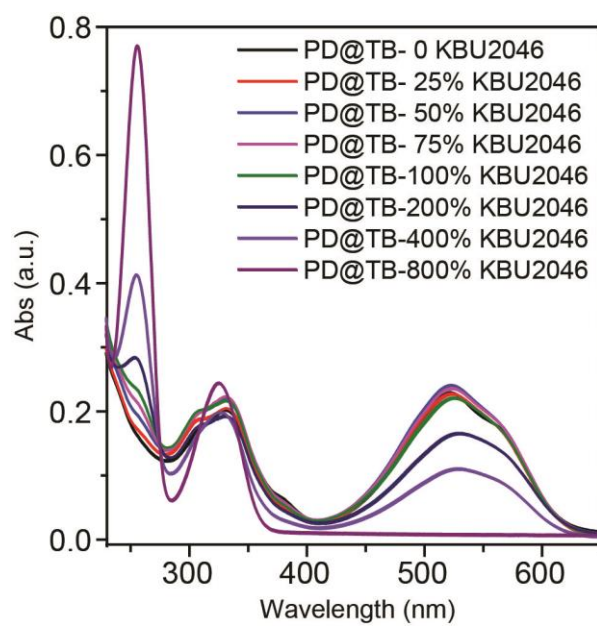

**Figure S6.** The drug loading capacity investigation of TPD@TB/KBU2046 nanoparticles.

**Figure S7**

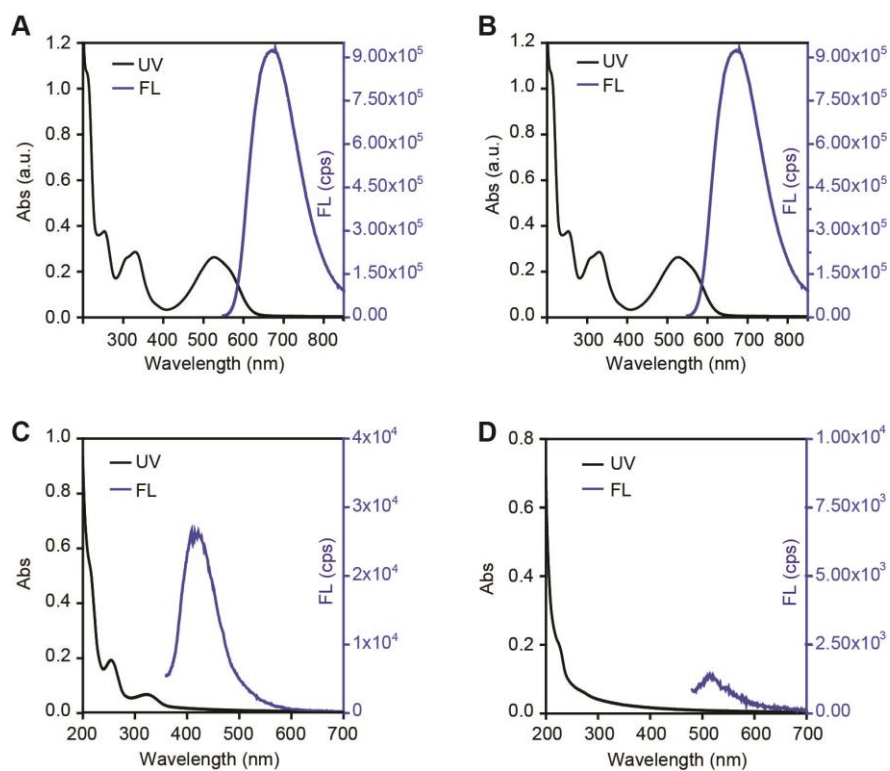

**Figure S7.** The UV-vis absorption and emission ( $E_x = 530$  nm) spectrum of (A) PD@TB/KBU2046, (B) TPD@TB, (C) TPD@KBU2046 and (D) TPD nanoparticles.



**Figure S8**

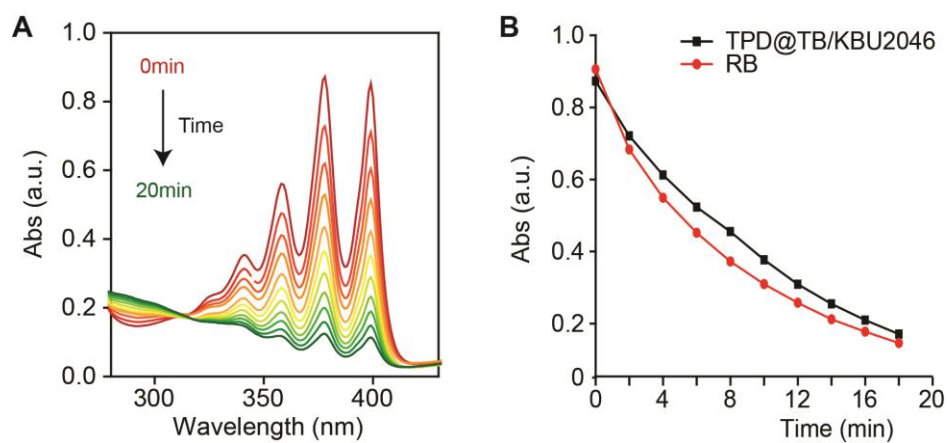

**Figure S8.** (A) The UV-vis absorption spectrum of the ROS indicator ABDA mixed with RB upon light irradiation (white light,  $100 \text{ mW cm}^{-2}$ ). (B) The photosensitive activity of TPD@TB/KBU2046 nanoparticles and RB.
